# Supplementary material for: Accuracy of intraoral scans in the mixed dentition: a prospective non-randomized comparative clinical trial
Source: Springer Nature journal article supplement (doi:10.1186/s13005-020-00222-6), 2020-05-19
Supplement: MOESM1 [file 17997004]

*Supplementary table. P-values of scan time (minutes:seconds) and amount of data (number of polygon points) concerning different patient variables.*

|                               | <i>scan time</i><br><i>p-value</i> | <i>n of polygon points</i><br><i>p-value</i> |
|-------------------------------|------------------------------------|----------------------------------------------|
| <b><i>Gender</i></b>          | 0.2029                             | 0.5877                                       |
| <b><i>Dentition phase</i></b> | 0.2989                             | 0.0149                                       |
| <b><i>Jaw</i></b>             | 0.1355                             | < 0.0001                                     |
| <b><i>Angle class</i></b>     | 0.3305                             | 0.4884                                       |

*P-values from Mann-Whitney U test or the Kruskal-Wallis test*
